# Genome-wide analysis of long noncoding RNA and mRNA co-expression profile in intrahepatic cholangiocarcinoma tissue by RNA sequencing

Wenhui Yang<sup>1,2</sup>, Yuan Li<sup>3</sup>, Xia Song<sup>2</sup>, Jun Xu<sup>2</sup>, Jun Xie<sup>1</sup>

<sup>1</sup>Department of Biochemistry and Molecular Biology, Shanxi Medical University, Taiyuan, Shanxi, China

<sup>2</sup>Shanxi Province Cancer Hospital, Affiliated Cancer Hospital of Shanxi Medical University, Taiyuan, Shanxi, China

<sup>3</sup>Department of Thoracic Surgery, National Cancer Center/Cancer Hospital, Chinese Academy of Medical Sciences and Peking Union Medical College, Beijing, China

**Correspondence to:** Jun Xu, **email:** junxuty@163.com  
Jun Xie, **email:** junxie@sxmu.edu.cn

**Keywords:** *intrahepatic cholangiocarcinoma, long noncoding RNA, co-expression, RNA sequencing*

**Received:** January 10, 2017

**Accepted:** February 13, 2017

**Published:** February 24, 2017

**Copyright:** Yang et al. This is an open-access article distributed under the terms of the Creative Commons Attribution License (CC-BY), which permits unrestricted use, distribution, and reproduction in any medium, provided the original author and source are credited.

## ABSTRACT

**Long noncoding RNAs (lncRNAs), which are pervasively transcribed in the genome, are emerging in molecular biology as crucial regulators of cancer. RNA-seq data were downloaded from GEO of NCBI and further analyzed to identify novel targets in intrahepatic cholangiocarcinoma (iCCA). We investigated differences in lncRNA and mRNA profiles between 7 pairs of iCCA and adjacent normal tissues. 230 lncRNAs were differentially expressed more than four-fold change in iCCA tissues. Among these, 97 were upregulated and 133 downregulated relatively to normal tissues. Moreover, 169 lncRNAs and 597 mRNAs formed the lncRNA-mRNA co-expression network which consist 766 network nodes and 769 connection edges. Bioinformatics analysis identified these dysregulated lncRNAs were associated with cholesterol homeostasis, insoluble fraction and lipid binding activity and were enriched in complement and coagulation cascades and PPAR signaling pathway. These results uncovered the landscape of iCCA-associated lncRNAs and co-expression network, providing insightful information about dysregulated lncRNAs in iCCA.**

## INTRODUCTION

Cholangiocarcinoma (CCA) is the most common biliary malignancy and the second most common hepatic malignancy after hepatocellular carcinoma [1]. Intrahepatic cholangiocarcinomas (iCCAs) are hepatobiliary cancers with features of cholangiocyte differentiation, which are located within the hepatic parenchyma [2]. iCCA is an aggressive malignancy with 5-year survival rate of less than 10% [2]. Surgery is the only curative option for iCCA. However, the resectability rate is low because patients typically present at advanced stages where there is no accepted standard of care [3, 4]. Therefore, the study of iCCA remains extremely important to improve the detection or therapy of iCCA.

In past decades, multiple important signaling pathways in tumorigenesis had been uncovered by analyzing the expression profiling of coding genes. etc. To the updated knowledge, actively transcribed long

noncoding RNAs (lncRNAs) identified by high-throughput platform are involved in even more complexed cancer genome regulatory networks. lncRNAs are endogenous cellular RNA transcripts longer than 200 nucleotides in length and without protein coding capacity [5]. lncRNAs, generally expressed at a lower level than coding genes, are emerging as crucial regulators of cancer in molecular biology and display more tissue-specific and cell-specific expression patterns [5–7].

lncRNAs are poorly conserved and have been shown to control every level of multi-level regulated gene expression pathway via cis or trans-acting mechanism [8]. Therefore, analysis of the co-expression of lncRNAs and mRNA can help to predict their functional role in the development of various diseases, including cancer and lay a foundation for uncovering the mechanism ultimately [9]. Dysregulated lncRNAs have been identified in breast cancer [10, 11], lung cancer [12, 13], colorectal cancer [14], renal cell carcinoma [15], and hepatocellular

carcinoma [16–18], etc., indicating that certain lncRNAs may participate in tumorigenesis. However, few lncRNA involved in iCCA has been revealed and understanding of lncRNAs in tumor biology is still in infancy especially in iCCA.

In this study, we reported profiles of differentially expressed lncRNAs and mRNAs in 7 pairs of iCCA and adjacent normal tissues. In particular, we evaluated the mRNAs that are co-expressed with the differentially expressed lncRNAs during the genesis of iCCA.

## RESULTS

### Differentially expressed lncRNAs and mRNAs in iCCA tissues

From the RNA-seq data, a comparison of lncRNA expression profile between the 7 pairs of iCCA and adjacent normal tissues identified 230 lncRNAs that were differentially expressed (fold change  $\geq 4$ ,  $P < 0.01$ ) between iCCA and the normal tissues (Figure 1A–1B, Supplementary Table 1). Among them, 97 lncRNAs were upregulated and 133 lncRNAs were downregulated (Figure 1A–1B, Supplementary Table 1). RP11-328K4.1, LINC01093, LINC00844, RP11-372E1.4 and ITIH4-AS1 were the five most significantly down-regulated lncRNAs while RP11-532F12.5, AC016735.1, RP11-284F21.7, LINC01123 and AC013275.2 were the five most significantly up-regulated lncRNAs in iCCA, respectively (Table 1).

Meanwhile, mRNA expression profiles in iCCA were compared with the noncancerous tissues. 2220 mRNAs were found differentially expressed (fold change  $\geq 4$ ,  $P < 0.001$ ) between iCCA and the noncancerous tissues. Among them, 640 mRNAs were downregulated and 1580 mRNAs were upregulated (Figure 1C–1D, Supplementary Table 2).

Then we asked whether these transcripts of 230 lncRNAs and 2220 mRNAs could distinguish iCCA from normal tissues. Figure 1A and 1C showed that the 7 iCCA samples are clustered together in one group and clearly separated from the samples of normal tissue in both heatmaps. The overall changes from a respective normal to cancer state were also seen separately as a difference in expression profile of either the lncRNA or the mRNA (Figure 1A, 1C). These observations suggest that a potential dynamic interaction between lncRNAs and mRNAs may be reshaping the landscape of the whole transcriptome during iCCA development.

### Significantly co-expressed mRNA in iCCA tissues

Genome-wide gene expression profiling of both lncRNAs and mRNAs from iCCA and normal tissue was conducted to detect possible associations of lncRNAs with iCCA. We predicted the potential target mRNAs for the 230 differentially expressed lncRNAs by using

the Spearman's correlation tests. As results, 597 mRNAs (Coef  $> 0.95$ ,  $P < 0.001$ ) were targeted by 169 lncRNAs (61 lncRNAs had none targets) (Table 1, Figure 2, Supplementary Table 3). Among them, 219 mRNAs were negatively correlated and 550 mRNAs were positively correlated (Figure 2, Supplementary Table 3).

### Construction of the co-expression network

We constructed a co-expression network of these dysregulated lncRNAs and their targeted mRNAs. Differently expressed lncRNAs and their significantly correlated mRNAs were imported to draw the network using Cytoscape (version 3.2.1). The co-expression network was composed of 766 network nodes and 769 connection edges between 169 lncRNAs and 597 mRNAs (Figure 2). Within this co-expression network, 550 pairs presented as positive, and 219 pairs presented as negative (Supplementary Table 3). Strikingly, over one third (59 in 169) of the lncRNAs and their correlated mRNAs were integrated in one complex network by sharing the same mRNAs (Figure 2). Moreover, this co-expression network revealed that one lncRNA could target up to 22 mRNAs and one coding gene could correlate with up to four lncRNAs (Figure 2, Supplementary Table 3).

### Go and KEGG pathway analysis

A GO enrichment analysis was applied to explore the functions of co-expressed mRNAs identified in this study. Genes were organized into hierarchical categories to uncover gene regulatory networks on the basis of biological process, cellular component and molecular function. Specifically, two-side Fisher's exact test was used to determine the GO category and GO annotation list was greater than expected by chance ( $P$  value  $< 0.05$  is recommended as the cut-off). Through GO analysis we found that these dysregulated transcripts of lncRNAs were associated with cholesterol homeostasis and sterol homeostasis (ontology: biological process), insoluble fraction and high-density lipoprotein particle (ontology: cellular component), lipid binding and cofactor binding activity (ontology: molecular function). The genes corresponding to the mRNAs 448 genes involved in biological processes, 443 genes involved in cellular components and 429 genes involved in molecular functions (Figures 2, 3A–3C, Supplementary Table 4).

Significant pathways of co-expressed mRNAs were compared with the KEGG database to further specify and identify target mRNAs among the 597 identified genes. Through the pathway analysis, we identified that 9 pathways were significantly enriched among the transcripts (Figure 3D, Supplementary Table 5). Among them, complement and coagulation cascades (hsa04610), PPAR signaling pathway (hsa03320) and glycine serine and threonine metabolism (hsa00260) were the 3 significantly

**Table 1: The five most significantly down- and up- regulated lncRNAs with their predicted targets**

| Ensemble ID     | Gene Symbol   | Regulation | Log <sub>2</sub> FC | P value  | Targets*            |
|-----------------|---------------|------------|---------------------|----------|---------------------|
| ENSG00000248740 | RP11-328K4.1  | Down       | 5.36                | 7.90E-13 | TP53/TGFA/AP2B1     |
| ENSG00000249173 | LINC01093     | Down       | 6.34                | 7.90E-13 | PPP2R1B/PRKX/C3     |
| ENSG00000237949 | LINC00844     | Down       | 6.01                | 9.24E-13 | APOE/PLG/CIDEAB     |
| ENSG00000243818 | RP11-372E1.4  | Down       | 5.18                | 1.43E-12 | ADH1C/CLEC4M        |
| ENSG00000239799 | ITIH4-AS1     | Down       | 5.10                | 1.99E-12 | C19orf80/NDRG3/MVP  |
| ENSG00000261183 | RP11-532F12.5 | Up         | 4.35                | 1.76E-09 | NA                  |
| ENSG00000224739 | AC016735.1    | Up         | 4.23                | 7.33E-09 | NA                  |
| ENSG00000229953 | RP11-284F21.7 | Up         | 3.60                | 1.10E-08 | ATP1B1/FITM1        |
| ENSG00000204588 | LINC01123     | Up         | 3.67                | 4.90E-08 | EFEMP1/ZNF431/TUBB3 |
| ENSG00000231013 | AC013275.2    | Up         | 4.47                | 5.73E-08 | IRAK1/JRKL/RHOC     |

\*mRNA targets for the lncRNAs were identified by Spearman correlation test (Coef > 0.95,  $P < 0.001$ ), only three targets were listed if there were more and NA represented no target was identified under the above conditions.

enriched networks respectively with FDR correction (FDR < 0.05). Some of these pathways, such as the classical gene category ‘drug metabolism’ and ‘metabolism of xenobiotics by cytochrome P450’ signaling pathway, have been reported to be involved in drug resistance in cancer, but the enrichments were not significant after FDR correction (Figure 3D, Supplementary Table 5).

## DISCUSSION

During the past two decades of molecular biological studies on human iCCA, a number of coding genes have been identified genetically or epigenetically responsible for iCCA development. A few reports have studied the function of certain coding genes or genetic and epigenetic alterations in pathogenesis of human CCA [2]. However, these studies have produced no definitive results, because they analyzed a limited number of genes in CCA, without separate analysis of different subtypes [2].

Moreover, to date, a small but growing number of lncRNAs have been experimentally investigated [19] and a view is emerging that lncRNAs can serve as signal, decoy, guide or scaffold molecules in regulation of gene expression [5]. Thus, this study was conducted to investigate the role of lncRNA in iCCA genesis. However, unlike microRNAs, increasing evidence has confirmed that lncRNAs not easily predicted based on lncRNA sequence [20, 21]. Thus, predicting potential cancer-related lncRNAs by integrating various kinds of biological data is one of the most important and attracting topics for biology research.

lncRNA H19 and HULC have been reported to play important roles in other tumors. Current evidence indicates that H19 plays crucial roles in tumor metastasis, through the regulation of critical events specifically the epithelial to mesenchymal and the mesenchymal to epithelial transitions [22]. HULC promotes tumor angiogenesis in liver cancer through miR-107/E2F1/SPHK1 signaling [23]

and modulates abnormal lipid metabolism in hepatoma cells through a miR-9-mediated RXRA signaling pathway [24]. We compared our results with a microarray study which reported dysregulated lncRNA profile in iCCA [25]. Though the role of H19 in tumor initiation and progression has long been a subject of controversy and HULC is highly over expressed in several tumors, H19 and HULC were significantly downregulated in iCCA tissues compared with normal tissues in both studies. Meanwhile, LINC01559, GS1-600G8.5 and FAM99A, LINC00844 were also significantly upregulated or downregulated respectively in both studies. Moreover, lncRNA UCA1 contributes to progression of hepatocellular carcinoma through inhibition of miR-216b and activation of FGFR1/ERK signaling pathway [26] and is upregulated in breast cancer [27], colorectal cancer [28], esophageal squamous cell carcinoma [29] and bladder carcinoma [30]. We detected a similar expression pattern of lncRNA UCA1 in our study. Thus, at least the above aberrant lncRNAs may be linked to iCCA tumorigenesis.

To date, few studies have reported dysregulation of lncRNAs in iCCA tissues and our data is the first RNA-seq analysis revealing 230 lncRNAs aberrantly expressed in iCCA tissues with fold changes of four or more. For instance, RP11-328K4.1 was the most significantly down-regulated lncRNAs in iCCA compared to the normal tissue and was significantly correlated with TP53, TGFA and AP2B1 (Table 1), which were key regulators in many tumors. Next, 169 the differentially expressed lncRNAs and 597 target mRNAs were integrated into one co-expression network. Bioinformatics analysis revealed that these dysregulated lncRNAs were associated with cholesterol homeostasis (ontology: biological process), insoluble fraction (ontology: cellular component) and lipid binding (ontology: molecular function), and were enriched in 9 gene pathways, e.g., complement and coagulation cascades and PPAR signaling pathway. Complement and coagulation cascades are implicated in many physiological and pathological processes

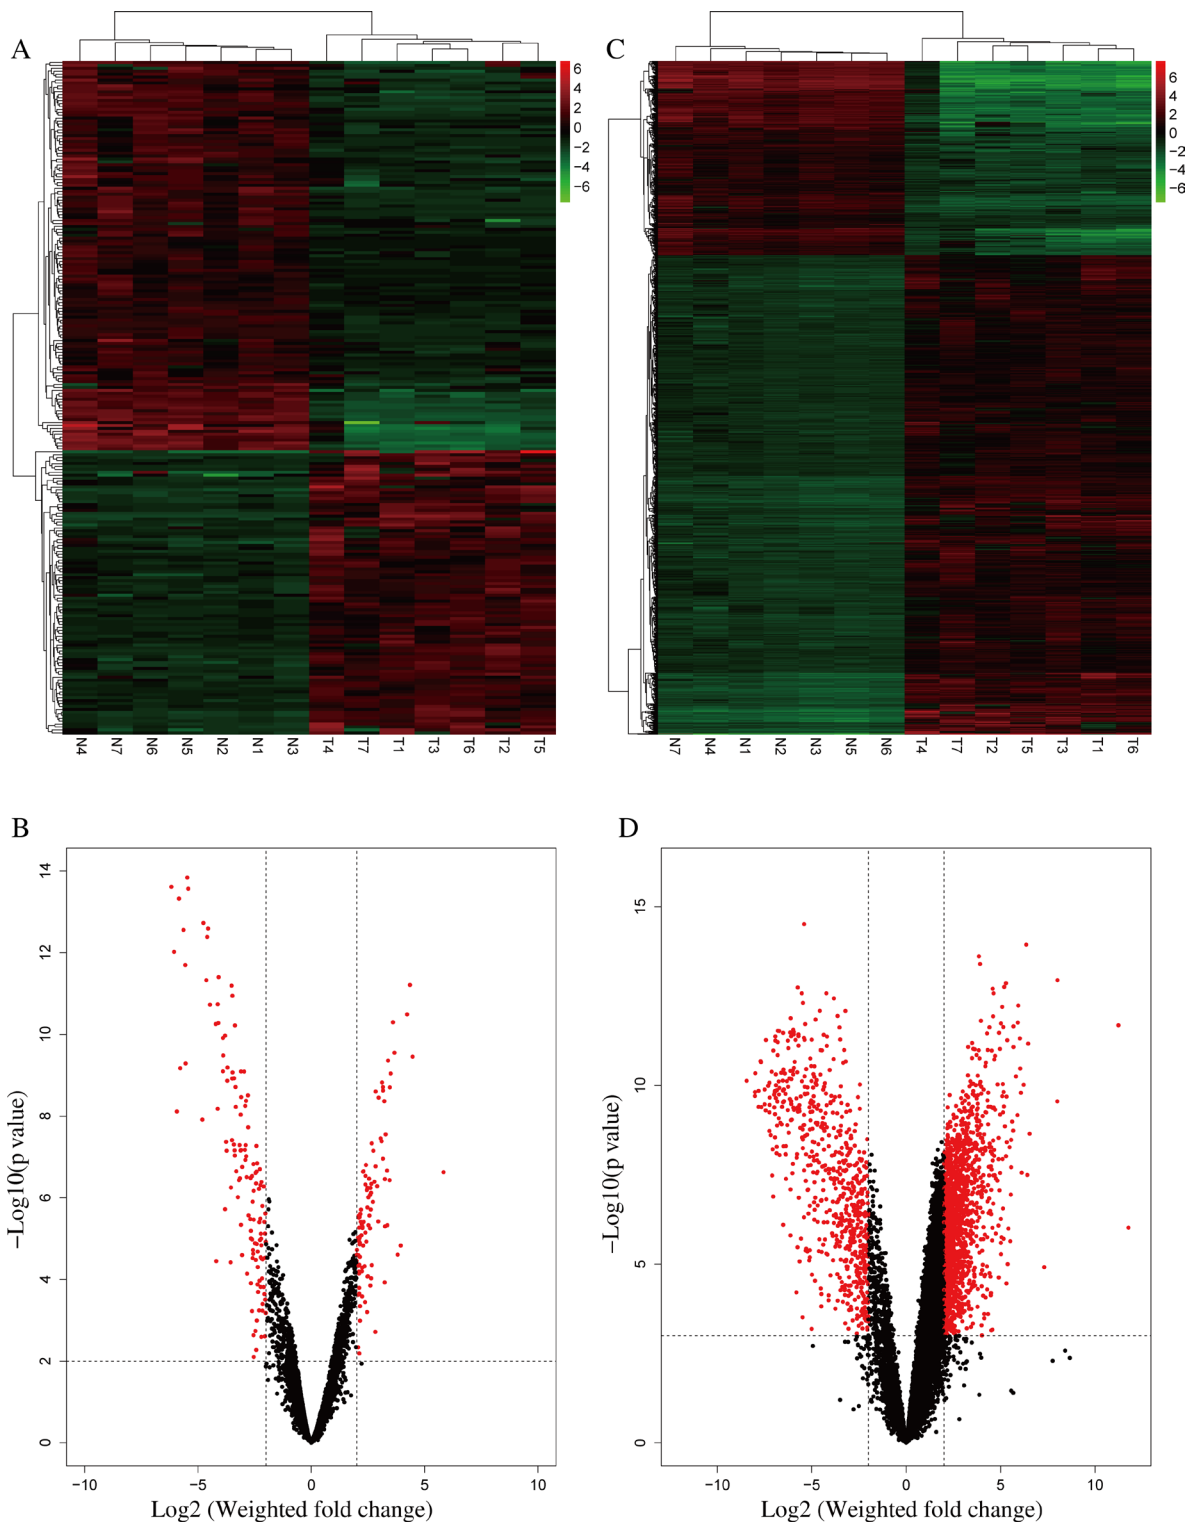

**Figure 1: Differentially expressed lncRNAs and mRNAs in iCCA.** (A) Heatmap of expression profiles for the 230 lncRNAs that showed significant expression changes (133 down-regulated and 97 up-regulated), red through green color indicates high to low expression level. (B) Volcano plot of the  $P$  values as a function of weighted fold-change for lncRNAs in the 7 normal and 7 tumor tissues. Dark dots represent lncRNAs not significantly differentially expressed (fold change  $< 4, P > 0.01$ ) and red dots represent lncRNAs significantly differentially expressed (fold change  $\geq 4, P < 0.01$ ). (C) Heatmap of expression profiles for 2220 mRNAs that showed significant expression changes (640 down-regulated and 1580 up-regulated), red through green color indicates high to low expression level. (D) Volcano plot of the  $P$  values as a function of weighted fold-change for mRNAs in the 7 normal and 7 tumor tissues. Dark dots represent mRNAs not significantly differentially expressed (fold change  $< 4, P > 0.001$ ) and red dots represent lncRNAs significantly differentially expressed (fold change  $\geq 4, P < 0.001$ ).



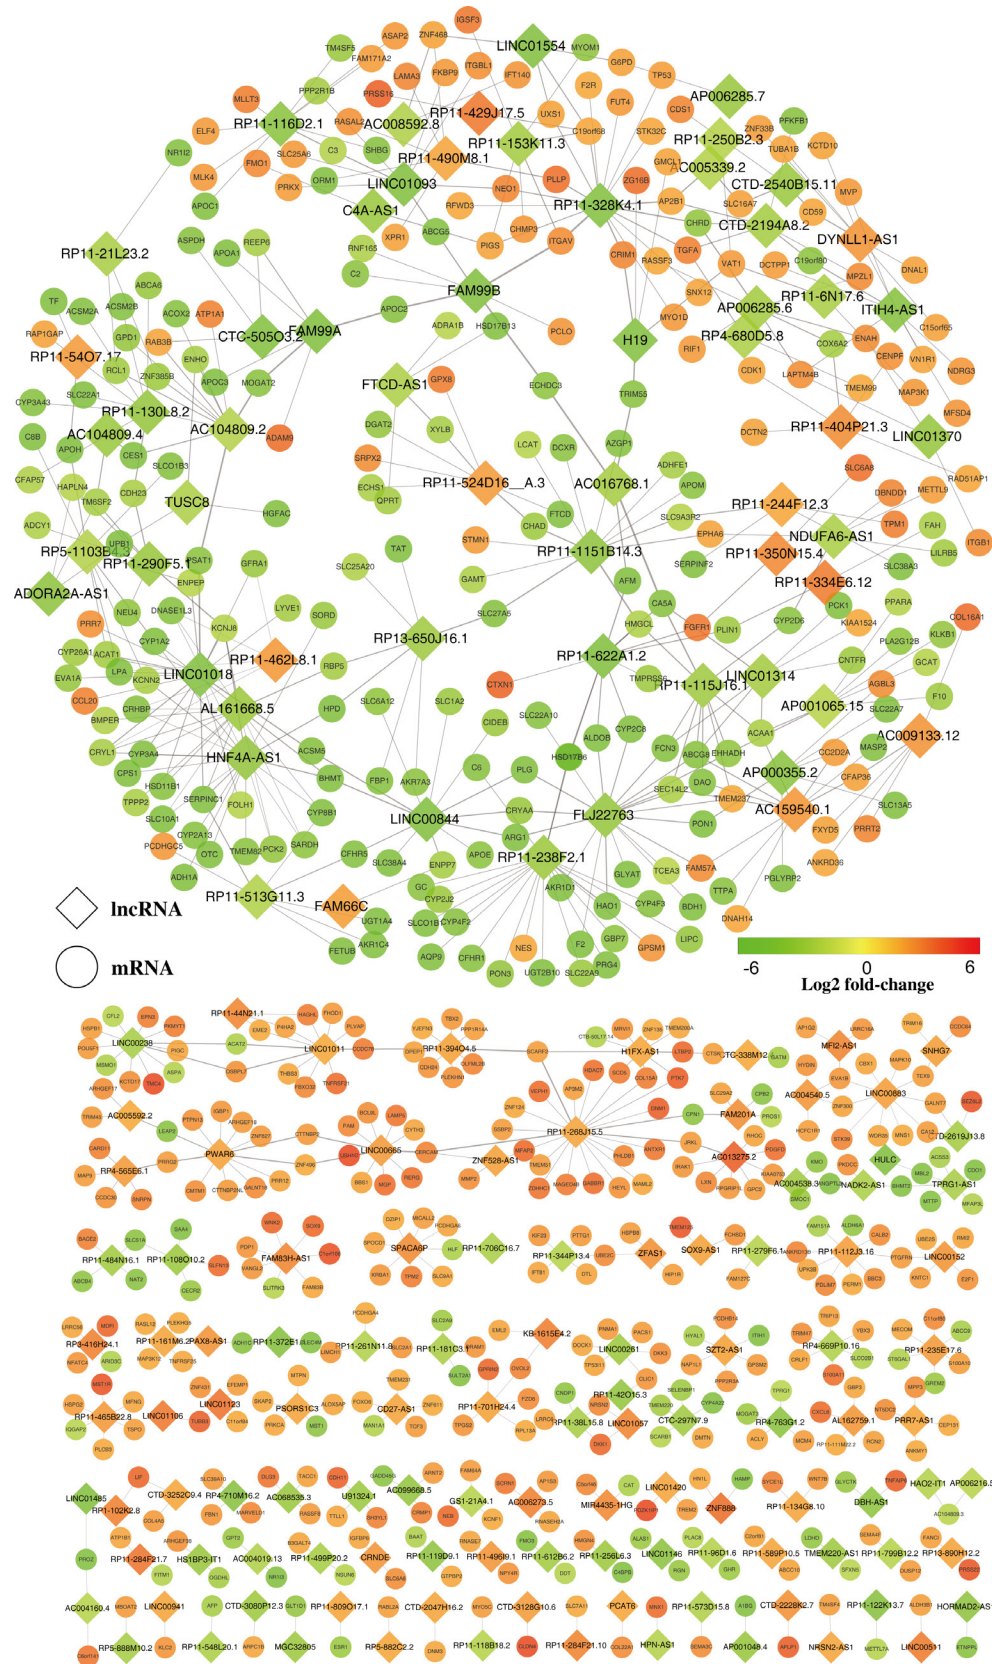

**Figure 2: Predicted lncRNA and mRNA co-expression network in iCCA.** The co-expression network was established between the 169 significantly expressed lncRNAs and 597 significantly differentially expressed mRNAs that had Spearman correlation coefficients equal to or greater than 0.95. Within this co-expression network, 550 pairs presented as positive, and 219 pairs presented as negative. The diamonds represent lncRNAs while the circles represent mRNAs. Red through green color indicates high to low expression level.

including the inflammatory processes, which are important contributing factors to tumorigenesis once dysregulated [31]. Besides, PPARs are linked to metabolic disorders and are interesting pharmaceutical targets in cancer [32, 33]. PPARs seem to have contradictory roles in tumorigenesis serving as an oncogene or tumor suppressor which might be related to different isoforms of PPARs. Recent studies indicate that PPAR $\alpha$ , which is commonly expressed in many tumor cell lines [34–36], could suppress colon carcinogenesis tumor development [37] and inhibit melanoma cell metastasis [38]. On the contrary, PPAR $\gamma$  ligands have been shown to promote differentiation and apoptosis in a variety of cancer cells including colon cancer [39], prostate cancer, gastric cancer [40], bladder cancer [41], breast cancer [42]. Mounting evidences suggest that PPARs involve in drug sensitivity and PPARs agonists have antitumor effects *in vitro* and *in vivo* in several cancers. Recent research reported that PPAR ligands were shown to upregulate the expression of human organic cation transporter type 1(hOCT1), leading to an increase in imatinib (the gold standard for the treatment of chronic myeloid leukemia) uptake [43], resulted in inhibiting cell growth and inducing differentiation and apoptosis. However, there were other studies suggest that PPARs agonists may cause some tumors. Several dual PPAR agonists induce bladder tumor and sarcomas formation in rodents [44, 45]. PPAR $\beta/\delta$  were implicated in the development of colon cancer [46], also stimulated the cell line proliferation of human breast and prostate cancers [47].

Do PPARs ligands suppress or promote the development of CCA? There were evidence suggesting anti-tumor effects of PPARs in CCA cell lines. PPAR $\gamma$  was expressed in CCA cell lines, its ligand inhibited the cell growth by inducing apoptosis and by cell

cycle regulation (G1 arrest), also by p53-dependent mechanisms [48, 49]. In addition, increasing researches has proved that epithelial-to-mesenchymal transition (EMT) as a mechanism promoting dissemination in CCA [50]. Some studies have demonstrated that activation of PPAR $\gamma$  could inhibit TGF- $\beta$ -induced EMT and prevents metastasis by antagonizing Smad3 function [51]. PPAR $\gamma$  also could increase Spry4 expression by Wnt7A/Fzd9 signaling then induced a reversal of the epithelial to mesenchymal transition [52]. Taken together, these results suggest that PPARs could inhibit or reversing EMT in CCA.

These results were specific in liver biological process and were significantly associated with clinical information. The present study demonstrated that lncRNAs might participate in the tumorigenesis of iCCA. The iCCA is a fatal bile duct cancer with dismal prognosis and limited therapeutic options, and its etiology and molecular pathogenesis remain largely unknown. Further studies will be needed to conclusively demonstrate and elucidate the precise role of lncRNAs in iCCA. This proof-of-principle study provides potential lncRNA targets for further investigations on molecular pathogenesis of iCCA.

## MATERIALS AND METHODS

### Data curation and reprocessing

Transcriptome sequencing data was downloaded from public available Gene Expression Omnibus (GEO, <http://www.ncbi.nlm.nih.gov/geo/>) under the accession number GSE63420 [53]. In brief, raw RNA-seq reads were

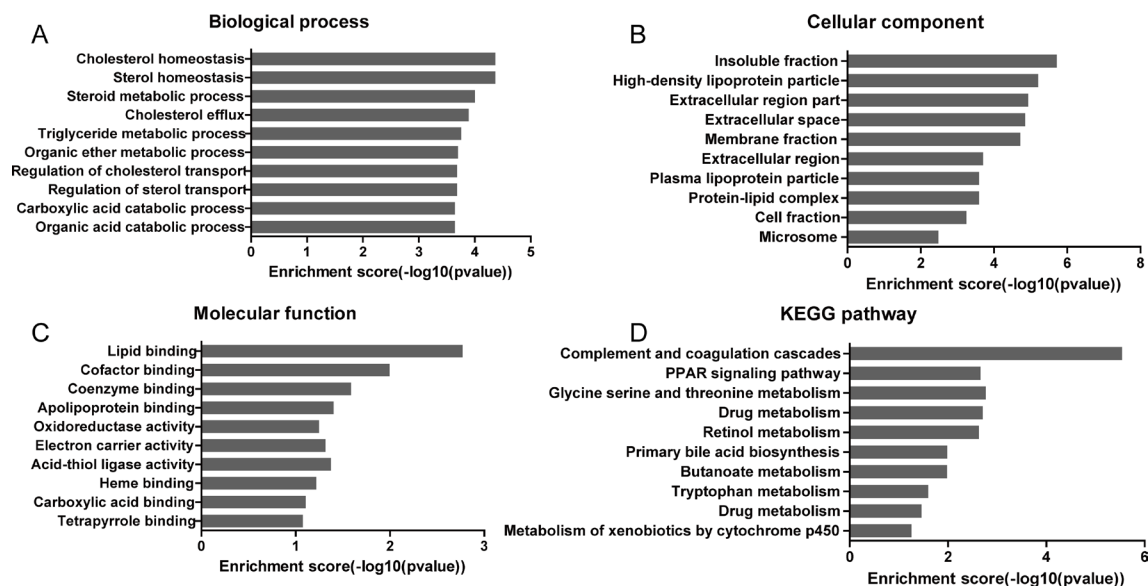

**Figure 3: GO and KEGG analysis of the significantly correlated mRNAs targeted by lncRNAs.** The ontology covers three domains: (A) Biological Process, (B) Cellular Component and (C) Molecular Function. (D) KEGG pathway enrichment analysis of the significantly correlated mRNAs targeted by lncRNAs.

aligned and mapped by TopHat v2.0.9 and transcriptome assemblies were performed by Cufflinks v2.1.1 with the default parameters [54, 55]. Only expressed genes were considered and the threshold of the expression value was set to 0.001. In this study, human lncRNA and protein-coding gene annotation was directly downloaded from GENECODE v22. All of the categories in the “long non-coding RNA gene annotation” GTF file were considered lncRNAs. To obtain genome-wide lncRNA and protein-coding gene expression profiles, normalized expression data were subsequently analyzed for differently expressed lncRNAs and mRNAs using Bioconductor packages (limma, version 3.26.1)[56] in R (version 3.2.2) with default parameters. Differentially expressed lncRNAs and mRNAs were identified through fold change filtering.

### Visualization of the lncRNA-mRNA regulatory network

The Spearman’s correlation test was used to estimate the co-expression relationships between the lncRNAs and mRNAs. Moreover, the significance *P*-value of the correlation coefficient was estimated. Finally, a set of co-expression genes of each lncRNA were identified under coefficient threshold of 0.95 and significance threshold of 0.001. “Guilty by association” is employed and the filtered co-expressed genes were defined as the potential targets of the lncRNAs in this study. Using Cytoscape (version 3.2.1), associations between lncRNAs and mRNAs were connected by solid lines to build the lncRNA-mRNA co-expression network.

### Bioinformatics analysis

Gene Ontology (GO) analysis is a functional analysis associating differentially expressed mRNAs with GO categories. The predicted target genes above were input into the Database for Annotation, Visualization and Integrated Discovery (DAVID; <http://david.abcc.ncifcrf.gov/>), which utilized GO to identify the molecular function represented in the gene profile. Furthermore, we also used the KEGG (Kyoto Encyclopedia of Genes and Genomes) database (<http://www.genome.ad.jp/kegg/>) to analyze the potential functions of these target genes in the pathways.

### Statistical analyses

The expression levels of lncRNAs and mRNAs that were differentially expressed between iCCA and normal tissues were compared using Bioconductor package (limma version 3.26.1) and R (version 3.2.2) software. Co-expression relationships between the lncRNAs and mRNAs were estimated by Spearman correlation test. The false discovery rate (FDR) was also calculated to correct the *P* value and statistical significance was considered as  $P < 0.05$  unless stated.

## CONFLICTS OF INTEREST

The authors indicate no potential conflicts of interest.

## REFERENCES

1. Welzel TM, McGlynn KA, Hsing AW, O’Brien TR, Pfeiffer RM. Impact of classification of hilar cholangiocarcinomas (Klatskin tumors) on the incidence of intra- and extrahepatic cholangiocarcinoma in the United States. *J Natl Cancer Inst.* 2006; 98:873–5. doi: 10.1093/jnci/djj234.
2. Rizvi S, Gores GJ. Pathogenesis, diagnosis, and management of cholangiocarcinoma. *Gastroenterology.* 2013; 145:1215–29. doi: 10.1053/j.gastro.2013.10.013.
3. Bridgewater J, Galle PR, Khan SA, Llovet JM, Park JW, Patel T, Pawlik TM, Gores GJ. Guidelines for the diagnosis and management of intrahepatic cholangiocarcinoma. *J Hepatol.* 2014; 60:1268–89. doi: 10.1016/j.jhep.2014.01.021.
4. Valle J, Wasan H, Palmer DH, Cunningham D, Anthony A, Maraveyas A, Madhusudan S, Iveson T, Hughes S, Pereira SP, Roughton M, Bridgewater J, Investigators ABCT. Cisplatin plus gemcitabine versus gemcitabine for biliary tract cancer. *N Engl J Med.* 2010; 362:1273–81. doi: 10.1056/NEJMoa0908721.
5. Rinn JL, Chang HY. Genome regulation by long noncoding RNAs. *Annu Rev Biochem.* 2012; 81:145–66. doi: 10.1146/annurev-biochem-051410-092902.
6. Gibb EA, Brown CJ, Lam WL. The functional role of long non-coding RNA in human carcinomas. *Mol Cancer.* 2011; 10:38. doi: 10.1186/1476-4598-10-38.
7. Brunner AL, Beck AH, Edris B, Sweeney RT, Zhu SX, Li R, Montgomery K, Varma S, Gilks T, Guo X, Foley JW, Witten DM, Giacomini CP, et al. Transcriptional profiling of long non-coding RNAs and novel transcribed regions across a diverse panel of archived human cancers. *Genome Biol.* 2012; 13:R75. doi: 10.1186/gb-2012-13-8-r75.
8. Wang KC, Chang HY. Molecular mechanisms of long noncoding RNAs. *Mol Cell.* 2011; 43:904–14. doi: 10.1016/j.molcel.2011.08.018.
9. Liu Z, Li X, Sun N, Xu Y, Meng Y, Yang C, Wang Y, Zhang K. Microarray profiling and co-expression network analysis of circulating lncRNAs and mRNAs associated with major depressive disorder. *PLoS One.* 2014; 9:e93388. doi: 10.1371/journal.pone.0093388.
10. Gupta RA, Shah N, Wang KC, Kim J, Horlings HM, Wong DJ, Tsai MC, Hung T, Argani P, Rinn JL, Wang Y, Brzoska P, Kong B, et al. Long non-coding RNA HOTAIR reprograms chromatin state to promote cancer metastasis. *Nature.* 2010; 464:1071–6. doi: 10.1038/nature08975.
11. Liu B, Sun L, Liu Q, Gong C, Yao Y, Lv X, Lin L, Yao H, Su F, Li D, Zeng M, Song E. A cytoplasmic NF-kappaB interacting long noncoding RNA blocks I kappaB phosphorylation and suppresses breast cancer



- metastasis. *Cancer Cell*. 2015; 27:370–81. doi: 10.1016/j.ccell.2015.02.004.
12. Ma MZ, Chu BF, Zhang Y, Weng MZ, Qin YY, Gong W, Quan ZW. Long non-coding RNA CCAT1 promotes gallbladder cancer development via negative modulation of miRNA-218–5p. *Cell Death Dis*. 2015; 6:e1583. doi: 10.1038/cddis.2014.541.
  13. Xu G, Chen J, Pan Q, Huang K, Pan J, Zhang W, Chen J, Yu F, Zhou T, Wang Y. Long noncoding RNA expression profiles of lung adenocarcinoma ascertained by microarray analysis. *PLoS One*. 2014; 9:e104044. doi: 10.1371/journal.pone.0104044.
  14. Shi Y, Liu Y, Wang J, Jie D, Yun T, Li W, Yan L, Wang K, Feng J. Downregulated Long Noncoding RNA BANCR Promotes the Proliferation of Colorectal Cancer Cells via Downregulation of p21 Expression. *PLoS One*. 2015; 10:e0122679. doi: 10.1371/journal.pone.0122679.
  15. Hirata H, Hinoda Y, Shahryari V, Deng G, Nakajima K, Tabatabai ZL, Ishii N, Dahiya R. Long Noncoding RNA MALAT1 Promotes Aggressive Renal Cell Carcinoma through Ezh2 and Interacts with miR-205. *Cancer Res*. 2015; 75:1322–31. doi: 10.1158/0008-5472.CAN-14-2931.
  16. Yang F, Huo XS, Yuan SX, Zhang L, Zhou WP, Wang F, Sun SH. Repression of the long noncoding RNA-LET by histone deacetylase 3 contributes to hypoxia-mediated metastasis. *Mol Cell*. 2013; 49:1083–96. doi: 10.1016/j.molcel.2013.01.010.
  17. Yuan JH, Yang F, Wang F, Ma JZ, Guo YJ, Tao QF, Liu F, Pan W, Wang TT, Zhou CC, Wang SB, Wang YZ, Yang Y, et al. A long noncoding RNA activated by TGF-beta promotes the invasion-metastasis cascade in hepatocellular carcinoma. *Cancer Cell*. 2014; 25:666–81. doi: 10.1016/j.ccr.2014.03.010.
  18. Zhu J, Liu S, Ye F, Shen Y, Tie Y, Zhu J, Jin Y, Zheng X, Wu Y, Fu H. The long noncoding RNA expression profile of hepatocellular carcinoma identified by microarray analysis. *PLoS One*. 2014; 9:e101707. doi: 10.1371/journal.pone.0101707.
  19. Derrien T, Guigo R, Johnson R. The Long Non-Coding RNAs: A New (P)layer in the “Dark Matter”. *Front Genet*. 2011; 2:107. doi: 10.3389/fgene.2011.00107.
  20. Khachane AN, Harrison PM. Mining mammalian transcript data for functional long non-coding RNAs. *PLoS One*. 2010; 5:e10316. doi: 10.1371/journal.pone.0010316.
  21. Hung T, Chang HY. Long noncoding RNA in genome regulation Prospects and mechanisms. *Rna Biology*. 2010; 7:582–5. doi:
  22. Matouk IJ, Halle D, Raveh E, Gilon M, Sorin V, Hochberg A. The role of the oncofetal H19 lncRNA in tumor metastasis: orchestrating the EMT-MET decision. *Oncotarget*. 2016; 7:3748–65. doi: 10.18632/oncotarget.6387.
  23. Lu Z, Xiao Z, Liu F, Cui M, Li W, Yang Z, Li J, Ye L, Zhang X. Long non-coding RNA HULC promotes tumor angiogenesis in liver cancer by up-regulating sphingosine kinase 1 (SPHK1). *Oncotarget*. 2016; 7:241–54. doi: 10.18632/oncotarget.6280.
  24. Cui M, Xiao Z, Wang Y, Zheng M, Song T, Cai X, Sun B, Ye L, Zhang X. Long noncoding RNA HULC modulates abnormal lipid metabolism in hepatoma cells through an miR-9-mediated RXRA signaling pathway. *Cancer Res*. 2015; 75:846–57. doi: 10.1158/0008-5472.CAN-14-1192.
  25. Wang J, Xie H, Ling Q, Lu D, Lv Z, Zhuang R, Liu Z, Wei X, Zhou L, Xu X, Zheng S. Coding-noncoding gene expression in intrahepatic cholangiocarcinoma. *Transl Res*. 2015. doi:10.1016/j.trsl.2015.07.007.
  26. Wang F, Ying HQ, He BS, Pan YQ, Deng QW, Sun HL, Chen J, Liu X, Wang SK. Upregulated lncRNA-UCA1 contributes to progression of hepatocellular carcinoma through inhibition of miR-216b and activation of FGFR1/ERK signaling pathway. *Oncotarget*. 2015; 6:7899–7917. doi: 10.18632/oncotarget.3219.
  27. Huang J, Zhou N, Watabe K, Lu Z, Wu F, Xu M, Mo YY. Long non-coding RNA UCA1 promotes breast tumor growth by suppression of p27 (Kip1). *Cell Death Dis*. 2014; 5:e1008. doi: 10.1038/cddis.2013.541.
  28. Han Y, Yang YN, Yuan HH, Zhang TT, Sui H, Wei XL, Liu L, Huang P, Zhang WJ, Bai YX. UCA1, a long non-coding RNA up-regulated in colorectal cancer influences cell proliferation, apoptosis and cell cycle distribution. *Pathology*. 2014; 46:396–401. doi: 10.1097/PAT.0000000000000125.
  29. Li JY, Ma X, Zhang CB. Overexpression of long non-coding RNA UCA1 predicts a poor prognosis in patients with esophageal squamous cell carcinoma. *Int J Clin Exp Pathol*. 2014; 7:7938–44.
  30. Yang C, Li X, Wang Y, Zhao L, Chen W. Long non-coding RNA UCA1 regulated cell cycle distribution via CREB through PI3-K dependent pathway in bladder carcinoma cells. *Gene*. 2012; 496:8–16. doi: 10.1016/j.gene.2012.01.012.
  31. Markiewski MM, Nilsson B, Ekdahl KN, Mollnes TE, Lambris JD. Complement and coagulation: strangers or partners in crime? *Trends Immunol*. 2007; 28:184–92. doi: 10.1016/j.it.2007.02.006.
  32. Bishop-Bailey D, Swales KE. The Role of PPARs in the Endothelium: Implications for Cancer Therapy. *PPAR Res*. 2008; 2008:904251. doi: 10.1155/2008/904251.
  33. Tachibana K, Yamasaki D, Ishimoto K, Doi T. The Role of PPARs in Cancer. *PPAR Res*. 2008; 2008:102737. doi: 10.1155/2008/102737.
  34. Collett GP, Betts AM, Johnson MI, Pulimood AB, Cook S, Neal DE, Robson CN. Peroxisome proliferator-activated receptor alpha is an androgen-responsive gene in human prostate and is highly expressed in prostatic adenocarcinoma. *Clin Cancer Res*. 2000; 6:3241–8.
  35. Panigrahy D, Kaipainen A, Huang S, Butterfield CE, Barnes CM, Fannon M, Laforme AM, Chaponis DM, Folkman J, Kieran MW. PPARalpha agonist fenofibrate suppresses tumor growth through direct and indirect



- angiogenesis inhibition. *Proc Natl Acad Sci USA*. 2008; 105:985–90. doi: 10.1073/pnas.0711281105.
36. Suchanek KM, May FJ, Robinson JA, Lee WJ, Holman NA, Monteith GR, Roberts-Thomson SJ. Peroxisome proliferator-activated receptor alpha in the human breast cancer cell lines MCF-7 and MDA-MB-231. *Mol Carcinog*. 2002; 34:165–71. doi: 10.1002/mc.10061.
  37. Tanaka T, Kohno H, Yoshitani S, Takashima S, Okumura A, Murakami A, Hosokawa M. Ligands for peroxisome proliferator-activated receptors alpha and gamma inhibit chemically induced colitis and formation of aberrant crypt foci in rats. *Cancer Res*. 2001; 61:2424–8. doi: 10.1158/1078-0432.ccr-05-2556.
  38. Grabacka M, Plonka PM, Urbanska K, Reiss K. Peroxisome proliferator-activated receptor alpha activation decreases metastatic potential of melanoma cells *in vitro* via down-regulation of Akt. *Clin Cancer Res*. 2006; 12:3028–36. doi: 10.1158/1078-0432.ccr-05-2556.
  39. Girnun GD, Smith WM, Drori S, Sarraf P, Mueller E, Eng C, Nambiar P, Rosenberg DW, Bronson RT, Edelmann W, Kucherlapati R, Gonzalez FJ, Spiegelman BM. APC-dependent suppression of colon carcinogenesis by PPARgamma. *Proc Natl Acad Sci USA*. 2002; 99:13771–6. doi: 10.1073/pnas.162480299.
  40. Qin L, Gong C, Chen AM, Guo FJ, Xu F, Ren Y, Liao H. Peroxisome proliferator-activated receptor gamma agonist rosiglitazone inhibits migration and invasion of prostate cancer cells through inhibition of the CXCR4/CXCL12 axis. *Mol Med Rep*. 2014; 10:695–700. doi: 10.3892/mmr.2014.2232.
  41. Yan S, Yang X, Chen T, Xi Z, Jiang X. The PPARgamma agonist Troglitazone induces autophagy, apoptosis and necroptosis in bladder cancer cells. *Cancer Gene Ther*. 2014; 21:188–93. doi: 10.1038/cgt.2014.16.
  42. Burstein HJ, Demetri GD, Mueller E, Sarraf P, Spiegelman BM, Winer EP. Use of the peroxisome proliferator-activated receptor (PPAR) gamma ligand troglitazone as treatment for refractory breast cancer: a phase II study. *Breast Cancer Res Treat*. 2003; 79:391–7.
  43. Yousefi B, Samadi N, Baradaran B, Shafiei-Irannejad V, Zarghami N. Peroxisome Proliferator-Activated Receptor Ligands and Their Role in Chronic Myeloid Leukemia: Therapeutic Strategies. *Chem Biol Drug Des*. 2016; 88:17–25. doi: 10.1111/cbdd.12737.
  44. Lubet RA, Fischer SM, Steele VE, Juliana MM, Desmond R, Grubbs CJ. Rosiglitazone, a PPAR gamma agonist: potent promoter of hydroxybutyl(butyl) nitrosamine-induced urinary bladder cancers. *Int J Cancer*. 2008; 123:2254–9. doi: 10.1002/ijc.23765.
  45. Pruijboom-Brees IM, Francone O, Pettersen JC, Kerlin RL, Will Y, Amacher DE, Boucher GG, Morton D. The development of subcutaneous sarcomas in rodents exposed to peroxisome proliferators agonists: hypothetical mechanisms of action and de-risking attitude. *Toxicol Pathol*. 2012; 40:810–8. doi: 10.1177/0192623312441406.
  46. Michalik L, Desvergne B, Wahli W. Peroxisome-proliferator-activated receptors and cancers: complex stories. *Nat Rev Cancer*. 2004; 4:61–70. doi: 10.1038/nrc1254.
  47. Stephen RL, Gustafsson MC, Jarvis M, Tatoud R, Marshall BR, Knight D, Ehrenborg E, Harris AL, Wolf CR, Palmer CN. Activation of peroxisome proliferator-activated receptor delta stimulates the proliferation of human breast and prostate cancer cell lines. *Cancer Res*. 2004; 64:3162–70. doi: 10.1158/0008-5472.CCR-03-2556.
  48. Kobuke T, Tazuma S, Hyogo H, Chayama K. A Ligand for peroxisome proliferator-activated receptor gamma inhibits human cholangiocarcinoma cell growth: potential molecular targeting strategy for cholangioma. *Dig Dis Sci*. 2006; 51:1650–7. doi: 10.1007/s10620-005-9064-2.
  49. Han C, Demetris AJ, Michalopoulos GK, Zhan Q, Shelhamer JH, Wu T. PPARgamma ligands inhibit cholangiocarcinoma cell growth through p53-dependent GADD45 and p21 pathway. *Hepatology*. 2003; 38:167–77. doi: 10.1053/jhep.2003.50296.
  50. Brivio S, Cadamuro M, Fabris L, Strazzabosco M. Epithelial-to-Mesenchymal Transition and Cancer Invasiveness: What Can We Learn from Cholangiocarcinoma? *J Clin Med*. 2015; 4:2028–41. doi: 10.3390/jcm4121958.
  51. Reka AK, Kurapati H, Narala VR, Bommer G, Chen J, Standiford TJ, Keshamouni VG. Peroxisome proliferator-activated receptor-gamma activation inhibits tumor metastasis by antagonizing Smad3-mediated epithelial-mesenchymal transition. *Mol Cancer Ther*. 2010; 9:3221–32. doi: 10.1158/1535-7163.mct-10-0570.
  52. Tennis MA, Van Scoyk MM, Freeman SV, Vandervest KM, Nemenoff RA, Winn RA. Sprouty-4 inhibits transformed cell growth, migration and invasion, and epithelial-mesenchymal transition, and is regulated by Wnt7A through PPARgamma in non-small cell lung cancer. *Mol Cancer Res*. 2010; 8:833–43. doi: 10.1158/1541-7786.mcr-09-0400.
  53. Sia D, Losic B, Moeini A, Cabellos L, Hao K, Revill K, Bonal D, Miltiadous O, Zhang Z, Hoshida Y, Cornella H, Castillo-Martin M, Pinyol R, et al. Massive parallel sequencing uncovers actionable FGFR2-PPHLN1 fusion and ARAF mutations in intrahepatic cholangiocarcinoma. *Nat Commun*. 2015; 6:6087. doi: 10.1038/ncomms7087.
  54. Trapnell C, Pachter L, Salzberg SL. TopHat: discovering splice junctions with RNA-Seq. *Bioinformatics*. 2009; 25:1105–11. doi: 10.1093/bioinformatics/btp120.
  55. Trapnell C, Williams BA, Pertea G, Mortazavi A, Kwan G, van Baren MJ, Salzberg SL, Wold BJ, Pachter L. Transcript assembly and quantification by RNA-Seq reveals unannotated transcripts and isoform switching during cell differentiation. *Nat Biotechnol*. 2010; 28:511–5. doi: 10.1038/nbt.1621.
  56. Ritchie ME, Phipson B, Wu D, Hu Y, Law CW, Shi W, Smyth GK. limma powers differential expression analyses for RNA-sequencing and microarray studies. *Nucleic Acids Res*. 2015; 43:e47. doi: 10.1093/nar/gkv007.
